# Supplementary material for: Two Different Inoculation Methods Unveiled the Relative Independence of DON Accumulation in Wheat Kernels from Disease Severity on Spike after Infection by Fusarium Head Blight
Source: MDPI journal article supplement (doi:10.3390/toxins13050353), 2021-05-14
Supplement: s1 [file s1]

# Supplementary Materials: Two Different Inoculation Methods Unveiled the Relative Independence of DON Accumulation in Wheat Kernels from Disease Severity on Spike after Infection by Fusarium Head Blight

Rong Wang, Chen Hua, Yi Hu, Lei Li, Zhengxi Sun and Tao Li\*

**Table S1.** Representative lines with contrasting combinations of PSS and DON under the BFI and the BRII methods.

| Serial Number | Fhb1 Stauts | PSS  |      | DON     |         | 3A-DON |      | 15A-DON |       | D3G  |      | Characteristics        |
|---------------|-------------|------|------|---------|---------|--------|------|---------|-------|------|------|------------------------|
|               |             | BFI  | BRII | BFI     | BRII    | BFI    | BRII | BFI     | BRII  | BFI  | BRII |                        |
| Ning7840      | +           | 0.05 | 0.00 | 589.35  | 260.76  | NF     | NF   | NF      | 11.69 | 2.82 | NF   |                        |
| Clark         | -           | 0.89 | 0.59 | 955.96  | 1152.30 | NF     | NF   | NF      | 12.26 | NF   | NF   |                        |
| W-104         | +           | 0.11 | 0.00 | 10.78   | 0.00    | NF     | NF   | NF      | 13.07 | NF   | NF   | LSLD                   |
| W-105         | +           | 0.07 | 0.00 | 108.79  | 83.31   | NF     | NF   | 18.94   | 11.22 | 2.88 | NF   | LSLD                   |
| W-114         | +           | 0.04 | 0.00 | 0.00    | 0.00    | NF     | NF   | 29.28   | 14.34 | NF   | NF   | LSLD                   |
| W-141         | +           | 0.04 | 0.00 | 125.06  | 21.27   | NF     | NF   | NF      | NF    | NF   | 2.82 | LSLD                   |
| W-145         | +           | 0.04 | 0.00 | 253.31  | 80.89   | NF     | NF   | 16.42   | 16.47 | NF   | 9.44 | LSLD                   |
| W-164         | +           | 0.06 | 0.00 | 0.00    | 0.00    | NF     | NF   | 17.21   | NF    | NF   | NF   | LSLD                   |
| W-165         | +           | 0.20 | 0.00 | 0.00    | 0.00    | NF     | NF   | 26.50   | 14.35 | NF   | 2.86 | LSLD                   |
| W-24          | +           | 0.05 | 0.00 | 111.69  | 151.49  | NF     | NF   | 11.67   | 11.13 | 3.24 | 3.86 | LSLD                   |
| W-52          | +           | 0.21 | 0.00 | 1226.44 | 1169.66 | NF     | NF   | 40.82   | NF    | NF   | NF   | LSHD                   |
| W-11          | -           | 1.00 | 1.00 | 4247.57 | 2094.47 | NF     | NF   | NF      | 24.99 | NF   | NF   | HSHD                   |
| W-17          | -           | 1.00 | 1.00 | 1768.83 | 2682.06 | NF     | NF   | NF      | NF    | NF   | NF   | HSHD                   |
| W-64          | +           | 1.00 | 1.00 | 181.36  | 197.78  | NF     | NF   | 14.62   | 12.56 | 2.94 | NF   | HSLD                   |
| W-53          | +           | 1.00 | 1.00 | 70.08   | 408.59  | NF     | NF   | 11.01   | 12.84 | NF   | NF   | HSLD                   |
| W-67          | +           | 0.69 | 0.71 | 4375.42 | 210.69  | NF     | NF   | 11.10   | 12.91 | NF   | NF   | BFI-DON >><br>BRII-DON |
| W-76          | -           | 1.00 | 1.00 | 208.88  | 4787.28 | NF     | NF   | 11.89   | NF    | 3.79 | NF   | BFI-DON <<<br>BRII-DON |

|       |   |      |      |         |         |    |    |    |       |    |    |                        |
|-------|---|------|------|---------|---------|----|----|----|-------|----|----|------------------------|
| W-81  | - | 0.79 | 1.00 | #####   | 1371.57 | NF | NF | NF | NF    | NF | NF | BFI-DON >><br>BRII-DON |
| W-149 | - | 1.00 | 1.00 | 6341.28 | 999.03  | NF | NF | NF | 54.19 | NF | NF | BFI-DON >><br>BRII-DON |

NF: not detected; +: with *Fhb1*, -: without *Fhb1*; HSHD: high severity/high DON; HSLD: high severity /low DON; LSHD: low severity /high DON; LSLD: low severity/low DON.

**Table S2.** Differences in D3G and 15A-DON between the two contrasting alleles of *Fhb1* under the BFI and the BRII methods.

| Trait   | Methods | <i>Fhb1</i> | Minimum | Maximum | Average | Difference of Average | Standard Deviation | T Value | df    | Significance |
|---------|---------|-------------|---------|---------|---------|-----------------------|--------------------|---------|-------|--------------|
| D3G     | BFI     | Yes         | 0.00    | 10.90   | 4.52    | 1.05                  | 2.82               | 1.29    | 13.66 | 0.22         |
|         |         | No          | 0.00    | 12.30   | 3.48    |                       | 0.56               |         |       |              |
|         | BRII    | Yes         | 0.00    | 66.30   | 6.52    | 3.74                  | 13.01              | -0.68   | 29.00 | 0.50         |
|         |         | No          | 0.00    | 36.10   | 10.26   |                       | 12.18              |         |       |              |
| 15A-DON | BFI     | Yes         | 0.00    | 100.60  | 24.95   | 8.83                  | 21.48              | -1.08   | 41.50 | 0.29         |
|         |         | No          | 0.00    | 165.90  | 33.78   |                       | 41.69              |         |       |              |
|         | BRII    | Yes         | 0.00    | 88.60   | 14.21   | 7.16                  | 11.64              | -2.48   | 71.76 | 0.02         |
|         |         | No          | 0.00    | 65.80   | 21.37   |                       | 15.08              |         |       |              |

**Table S3.** Overall resistance based on Mahalanobis distance to the postulated reference.

| Entry | <i>Fhb1</i> Genotype | BFI-PSS | BRII-PSS | BFI-DON | BRII-DON | Mahalanobis Distance (d <sup>2</sup> ) |
|-------|----------------------|---------|----------|---------|----------|----------------------------------------|
| Ref   |                      | 0.00    | 0.00     | 0       | 0        | 0.000                                  |
| W-109 | +                    | 0.56    | 0.00     | 0.0     | 0.0      | 0.000                                  |
| W-114 | +                    | 0.04    | 0.00     | 0.0     | 0.0      | 0.000                                  |
| W-164 | +                    | 0.06    | 0.00     | 0.0     | 0.0      | 0.000                                  |
| W-165 | +                    | 0.20    | 0.00     | 0.0     | 0.0      | 0.000                                  |

|       |   |      |      |       |       |       |
|-------|---|------|------|-------|-------|-------|
| W-104 | + | 0.11 | 0.00 | 10.8  | 0.0   | 0.000 |
| W-105 | + | 0.07 | 0.00 | 108.8 | 83.3  | 0.008 |
| W-141 | + | 0.04 | 0.00 | 125.1 | 21.3  | 0.008 |
| W-126 | + | 0.43 | 0.00 | 109.1 | 94.2  | 0.009 |
| W-32  | + | 0.26 | 0.00 | 107.6 | 107.6 | 0.011 |
| W-24  | + | 0.05 | 0.00 | 111.7 | 151.5 | 0.019 |
| W-145 | + | 0.04 | 0.00 | 253.3 | 80.9  | 0.033 |
| W-120 | + | 0.07 | 0.00 | 177.7 | 216.5 | 0.039 |
| W-161 | + | 0.30 | 0.00 | 236.3 | 236.3 | 0.052 |
| W-26  | - | 0.45 | 0.00 | 309.4 | 222.6 | 0.062 |
| W-21  | + | 0.13 | 0.00 | 118.1 | 287.3 | 0.064 |
| W-168 | + | 0.46 | 0.07 | 338.6 | 103.8 | 0.065 |
| W-154 | + | 0.10 | 0.00 | 341.0 | 211.6 | 0.068 |
| W-42  | + | 0.16 | 0.00 | 352.0 | 25.5  | 0.070 |
| W-151 | + | 0.17 | 0.00 | 292.9 | 281.8 | 0.075 |
| W-27  | + | 0.12 | 0.00 | 319.1 | 274.0 | 0.078 |
| W-146 | + | 0.14 | 0.00 | 265.3 | 301.9 | 0.078 |
| W-113 | + | 0.17 | 0.00 | 344.4 | 332.6 | 0.105 |
| W-51  | + | 0.10 | 0.00 | 317.3 | 349.2 | 0.107 |
| W-13  | + | 0.22 | 0.00 | 259.3 | 365.3 | 0.107 |
| W-143 | + | 0.18 | 0.00 | 424.0 | 294.6 | 0.113 |
| W-112 | + | 0.20 | 0.00 | 358.3 | 358.3 | 0.119 |
| W-133 | + | 0.67 | 0.00 | 523.9 | 207.7 | 0.140 |
| W-150 | + | 0.07 | 0.00 | 392.4 | 413.4 | 0.153 |
| W-115 | + | 0.18 | 0.00 | 395.6 | 439.8 | 0.168 |
| W-3   | + | 0.59 | 0.00 | 446.8 | 437.9 | 0.180 |
| W-1   | + | 0.05 | 0.00 | 589.3 | 260.8 | 0.180 |
| W-47  | + | 0.30 | 0.02 | 453.7 | 517.6 | 0.213 |
| W-46  | + | 0.84 | 0.13 | 648.7 | 325.6 | 0.231 |
| W-122 | + | 0.81 | 0.12 | 524.2 | 523.1 | 0.238 |

|       |   |      |      |        |        |       |
|-------|---|------|------|--------|--------|-------|
| W-135 | + | 0.63 | 0.20 | 437.6  | 216.7  | 0.274 |
| W-117 | - | 0.25 | 0.19 | 427.4  | 515.3  | 0.317 |
| W-130 | + | 0.58 | 0.00 | 587.2  | 600.7  | 0.329 |
| W-155 | + | 0.22 | 0.00 | 608.8  | 598.3  | 0.335 |
| W-170 | + | 0.19 | 0.22 | 0.0    | 0.0    | 0.371 |
| W-55  | + | 0.10 | 0.22 | 679.5  | 250.9  | 0.406 |
| W-139 | + | 0.05 | 0.00 | 884.8  | 63.7   | 0.445 |
| W-175 | + | 0.04 | 0.04 | 745.8  | 759.9  | 0.479 |
| W-144 | + | 0.45 | 0.00 | 362.9  | 820.4  | 0.523 |
| W-119 | + | 0.85 | 0.00 | 755.0  | 750.6  | 0.523 |
| W-147 | + | 0.16 | 0.00 | 1002.1 | 165.5  | 0.534 |
| W-177 | - | 1.00 | 0.27 | 426.2  | 563.0  | 0.535 |
| W-163 | + | 0.17 | 0.00 | 826.9  | 826.9  | 0.632 |
| W-93  | - | 0.04 | 0.16 | 925.1  | 915.6  | 0.674 |
| W-54  | + | 0.41 | 0.02 | 1097.7 | 49.7   | 0.684 |
| W-12  | + | 0.46 | 0.00 | 923.0  | 839.1  | 0.698 |
| W-16  | + | 0.81 | 0.19 | 1198.5 | 687.0  | 0.722 |
| W-106 | + | 0.26 | 0.00 | 916.1  | 883.5  | 0.740 |
| W-91  | + | 0.83 | 0.36 | 296.6  | 327.2  | 0.837 |
| W-129 | - | 1.00 | 0.26 | 1060.2 | 38.0   | 0.893 |
| W-66  | - | 0.82 | 0.35 | 0.0    | 0.0    | 0.941 |
| W-73  | + | 0.82 | 0.37 | 63.9   | 0.0    | 0.982 |
| W-102 | - | 0.41 | 0.09 | 1144.8 | 1116.8 | 1.025 |
| W-166 | + | 0.22 | 0.06 | 242.3  | 1182.9 | 1.095 |
| W-100 | - | 0.86 | 0.00 | 1144.9 | 1130.4 | 1.192 |
| W-121 | + | 0.42 | 0.42 | 147.7  | 147.7  | 1.192 |
| W-86  | + | 0.16 | 0.40 | 0.0    | 0.0    | 1.223 |
| W-52  | + | 0.21 | 0.00 | 1226.4 | 1169.7 | 1.307 |
| W-140 | - | 0.70 | 0.31 | 1259.6 | 1191.3 | 1.311 |
| W-22  | + | 0.06 | 0.00 | 941.1  | 1334.6 | 1.424 |

|       |   |      |      |        |        |       |
|-------|---|------|------|--------|--------|-------|
| W-103 | - | 1.00 | 0.16 | 1417.2 | 1417.2 | 1.588 |
| W-43  | + | 1.00 | 0.40 | 1287.5 | 98.0   | 1.627 |
| W-71  | + | 0.07 | 0.06 | 1776.5 | 188.2  | 1.663 |
| W-29  | - | 1.00 | 0.38 | 527.4  | 1385.7 | 1.798 |
| W-174 | - | 0.05 | 0.50 | 0.0    | 0.0    | 1.877 |
| W-23  | - | 1.00 | 0.26 | 1984.6 | 550.7  | 1.886 |
| W-152 | + | 0.45 | 0.00 | 1428.7 | 1428.7 | 1.888 |
| W-87  | - | 1.00 | 0.55 | 626.2  | 686.1  | 1.963 |
| W-25  | + | 0.24 | 0.55 | 447.9  | 649.3  | 1.968 |
| W-20  | - | 0.32 | 0.56 | 396.5  | 465.0  | 2.070 |
| W-80  | + | 0.63 | 0.54 | 117.1  | 0.0    | 2.124 |
| W-99  | - | 0.54 | 0.22 | 2199.4 | 1211.2 | 2.298 |
| W-33  | + | 0.67 | 0.55 | 1279.6 | 1279.6 | 2.380 |
| W-2   | - | 0.89 | 0.59 | 956.0  | 1152.3 | 2.462 |
| W-50  | - | 0.74 | 0.18 | 2349.0 | 1016.1 | 2.507 |
| W-38  | - | 1.00 | 0.53 | 1605.7 | 1434.4 | 2.547 |
| W-107 | + | 0.10 | 0.60 | 126.7  | 126.7  | 2.563 |
| W-97  | - | 0.81 | 0.71 | 639.9  | 651.2  | 3.281 |
| W-123 | - | 1.00 | 0.00 | 1904.0 | 1877.1 | 3.290 |
| W-148 | - | 0.05 | 0.34 | 1130.3 | 2172.4 | 3.349 |
| W-162 | + | 0.40 | 0.70 | 307.4  | 800.5  | 3.370 |
| W-14  | - | 1.00 | 0.72 | 1245.8 | 1229.3 | 3.535 |
| W-132 | - | 1.00 | 0.63 | 1746.9 | 1781.9 | 3.591 |
| W-176 | + | 0.67 | 0.67 | 1702.2 | 1702.2 | 3.713 |
| W-59  | - | 0.68 | 0.49 | 329.6  | 1982.2 | 3.888 |
| W-7   | - | 0.83 | 0.71 | 1761.3 | 1642.0 | 3.952 |
| W-173 | - | 0.08 | 0.75 | 163.7  | 168.4  | 3.995 |
| W-6   | - | 1.00 | 0.72 | 1947.2 | 1722.0 | 4.235 |
| W-131 | - | 1.00 | 0.29 | 2785.6 | 146.5  | 4.324 |
| W-34  | - | 0.55 | 0.64 | 1685.3 | 2159.1 | 4.363 |

---

|       |   |      |      |        |        |       |
|-------|---|------|------|--------|--------|-------|
| W-157 | - | 1.00 | 0.80 | 734.4  | 165.4  | 4.400 |
| W-44  | - | 1.00 | 0.83 | 555.7  | 566.7  | 4.564 |
| W-158 | - | 1.00 | 0.80 | 1327.6 | 167.9  | 4.604 |
| W-108 | - | 0.83 | 0.78 | 1816.7 | 1961.6 | 4.947 |
| W-156 | - | 0.95 | 0.88 | 1268.9 | 1289.9 | 4.996 |
| W-45  | - | 1.00 | 0.85 | 1722.3 | 1760.0 | 5.207 |
| W-137 | + | 0.32 | 0.90 | 881.9  | 1292.2 | 5.382 |
| W-30  | - | 1.00 | 0.92 | 1118.5 | 1339.8 | 5.510 |
| W-40  | - | 1.00 | 0.92 | 997.4  | 287.4  | 5.686 |
| W-15  | - | 1.00 | 0.93 | 563.6  | 556.4  | 5.761 |
| W-82  | - | 0.83 | 0.62 | 2513.6 | 2739.4 | 6.157 |
| W-58  | - | 1.00 | 1.00 | 1061.2 | 1074.5 | 6.397 |
| W-62  | - | 1.00 | 1.00 | 979.5  | 966.7  | 6.405 |
| W-61  | - | 0.74 | 1.00 | 968.4  | 1006.0 | 6.413 |
| W-41  | - | 1.00 | 1.00 | 1682.1 | 1155.3 | 6.453 |
| W-136 | - | 1.00 | 1.00 | 903.9  | 622.7  | 6.499 |
| W-49  | - | 1.00 | 1.00 | 1469.3 | 618.2  | 6.588 |
| W-31  | - | 1.00 | 1.00 | 2126.9 | 1323.4 | 6.744 |
| W-172 | - | 0.84 | 0.91 | 2349.1 | 2349.1 | 6.988 |
| W-72  | - | 0.57 | 1.00 | 76.8   | 678.8  | 7.076 |
| W-53  | + | 1.00 | 1.00 | 70.1   | 408.6  | 7.126 |
| W-142 | + | 0.91 | 1.00 | 1518.9 | 199.3  | 7.154 |
| W-64  | + | 1.00 | 1.00 | 181.4  | 197.8  | 7.154 |
| W-56  | - | 0.89 | 1.00 | 352.9  | 1356.5 | 7.158 |
| W-37  | - | 1.00 | 1.00 | 1313.5 | 1967.9 | 7.172 |
| W-48  | - | 0.87 | 0.92 | 2251.5 | 2477.5 | 7.289 |
| W-77  | - | 0.84 | 1.00 | 2454.4 | 2168.5 | 7.619 |
| W-8   | - | 1.00 | 0.75 | 3770.5 | 2282.7 | 7.948 |
| W-57  | - | 0.93 | 0.76 | 3988.7 | 1792.4 | 8.318 |
| W-79  | - | 0.81 | 1.00 | 2316.9 | 2694.5 | 8.568 |

---

|       |   |      |      |         |        |        |
|-------|---|------|------|---------|--------|--------|
| W-17  | - | 1.00 | 1.00 | 1768.8  | 2682.1 | 8.573  |
| W-65  | + | 1.00 | 0.58 | 3278.5  | 3325.1 | 8.767  |
| W-159 | + | 0.48 | 0.00 | 3249.1  | 3319.5 | 10.052 |
| W-169 | - | 0.92 | 0.31 | 4381.6  | 411.7  | 10.056 |
| W-88  | + | 0.81 | 0.40 | 3621.1  | 3543.5 | 10.083 |
| W-11  | - | 1.00 | 1.00 | 4247.6  | 2094.5 | 10.893 |
| W-125 | - | 1.00 | 0.00 | 3413.1  | 3468.7 | 11.013 |
| W-67  | + | 0.69 | 0.71 | 4375.4  | 210.7  | 11.892 |
| W-74  | - | 1.00 | 1.00 | 3912.4  | 263.2  | 12.380 |
| W-171 | - | 0.92 | 0.90 | 4087.5  | 117.8  | 12.482 |
| W-28  | - | 1.00 | 1.00 | 1532.6  | 3716.4 | 12.715 |
| W-75  | - | 1.00 | 1.00 | 251.9   | 3453.0 | 13.980 |
| W-39  | + | 1.00 | 0.70 | 4461.4  | 4090.6 | 14.097 |
| W-78  | - | 0.65 | 0.84 | 2153.9  | 4433.2 | 14.695 |
| W-68  | - | 0.93 | 1.00 | 567.4   | 3981.0 | 16.052 |
| W-10  | - | 0.89 | 0.85 | 4208.7  | 4857.0 | 17.708 |
| W-149 | - | 1.00 | 1.00 | 6341.3  | 999.0  | 22.093 |
| W-76  | - | 1.00 | 1.00 | 208.9   | 4787.3 | 22.633 |
| W-167 | - | 0.48 | 0.00 | 3102.7  | 5630.5 | 24.594 |
| W-116 | + | 0.91 | 0.00 | 5281.6  | 5373.2 | 26.408 |
| W-81  | - | 0.79 | 1.00 | 11081.8 | 1371.6 | 62.924 |

Ref. A postulated reference with the best overall resistance.

**Table S4.** Technical Note: The Conditions of Mass Spectrometry Parameters.

| Name   | Parent | Product | SRM Collision Energy | Retention Time | Time Window | Polarity |
|--------|--------|---------|----------------------|----------------|-------------|----------|
| DON    | 297.1  | 91.1    | 40                   | 5              | 8           | +        |
| DON    | 297.1  | 175.2   | 15                   | 5              | 8           | +        |
| 3-ADON | 339    | 63.1    | 19                   | 5              | 8           | +        |

---

|         |       |       |    |   |   |   |
|---------|-------|-------|----|---|---|---|
| 3-ADON  | 339   | 266.3 | 23 | 5 | 8 | + |
| 15-ADON | 339   | 63    | 16 | 5 | 8 | + |
| 15-ADON | 339   | 137.1 | 5  | 5 | 8 | + |
| D3G     | 503.1 | 427.2 | 22 | 5 | 8 | - |
| D3G     | 503.1 | 457.3 | 18 | 5 | 8 | - |

---

Limit of determination is 1 µg/kg.; +, positive ion mode; -, Negative ion mode.
